# Supplementary material
Source: publisher figshare collection journal article supplement (https://acs.figshare.com/ndownloader/files/5753067)
Supplement: Supplementary file 1 [file 5753067]

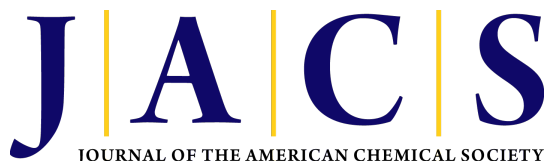

JOURNAL OF THE AMERICAN CHEMICAL SOCIETY

J. Am. Chem. Soc., 1997, 119(12), 2804-2811, DOI:[10.1021/ja963476k](https://doi.org/10.1021/ja963476k)

#### Terms & Conditions

Electronic Supporting Information files are available without a subscription to ACS Web Editions. The American Chemical Society holds a copyright ownership interest in any copyrightable Supporting Information. Files available from the ACS website may be downloaded for personal use only. Users are not otherwise permitted to reproduce, republish, redistribute, or sell any Supporting Information from the ACS website, either in whole or in part, in either machine-readable form or any other form without permission from the American Chemical Society. For permission to reproduce, republish and redistribute this material, requesters must process their own requests via the RightsLink permission system. Information about how to use the RightsLink permission system can be found at <http://pubs.acs.org/page/copyright/permissions.html>

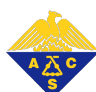

ACS Publications

MOST TRUSTED. MOST CITED. MOST READ.

Copyright © 1997 American Chemical Society

### Figure Captions for Supplementary Material

- Suppl Fig 1. Experimental (left) and digitally simulated (right) CV responses of 0.21 mM **1** in CH<sub>2</sub>Cl<sub>2</sub> at 293 K. Scan rates are (a) 0.05 V/s (b) 0.20 V/s (c) 0.40 V/s and (d) 1.6 V/s. Simulation parameters given in Table III.
- Suppl Fig 2. IR spectrum after exhaustive anodic electrolysis of 1.0 mM **1** in CH<sub>2</sub>Cl<sub>2</sub> at  $E_{\text{appl}} = 0$  V recorded with fiber optic probe. Assignments of X and Y: 2024 and 1959 cm<sup>-1</sup> (Y): CpCo(CO)<sub>2</sub>; 2011 and 1935 cm<sup>-1</sup> (X): Cp<sup>\*</sup>Ir(CO)<sub>2</sub>.
- Suppl Fig 3. Integrated <sup>1</sup>H-NMR resonances of **1** and **2** recorded on a d<sub>8</sub>-toluene solution over a period of about 16 hours. The concentrations in the Figure are normalized for a small amount of a side product which reached about 10% total composition by the end of the experiment.
- Suppl Fig 4. Fluid solution ESR spectrum of the reduction product of **1** (assigned to **2**<sup>-</sup>) in THF after brief contact with K at 213 K. Spectrum recorded at ambient temperature.

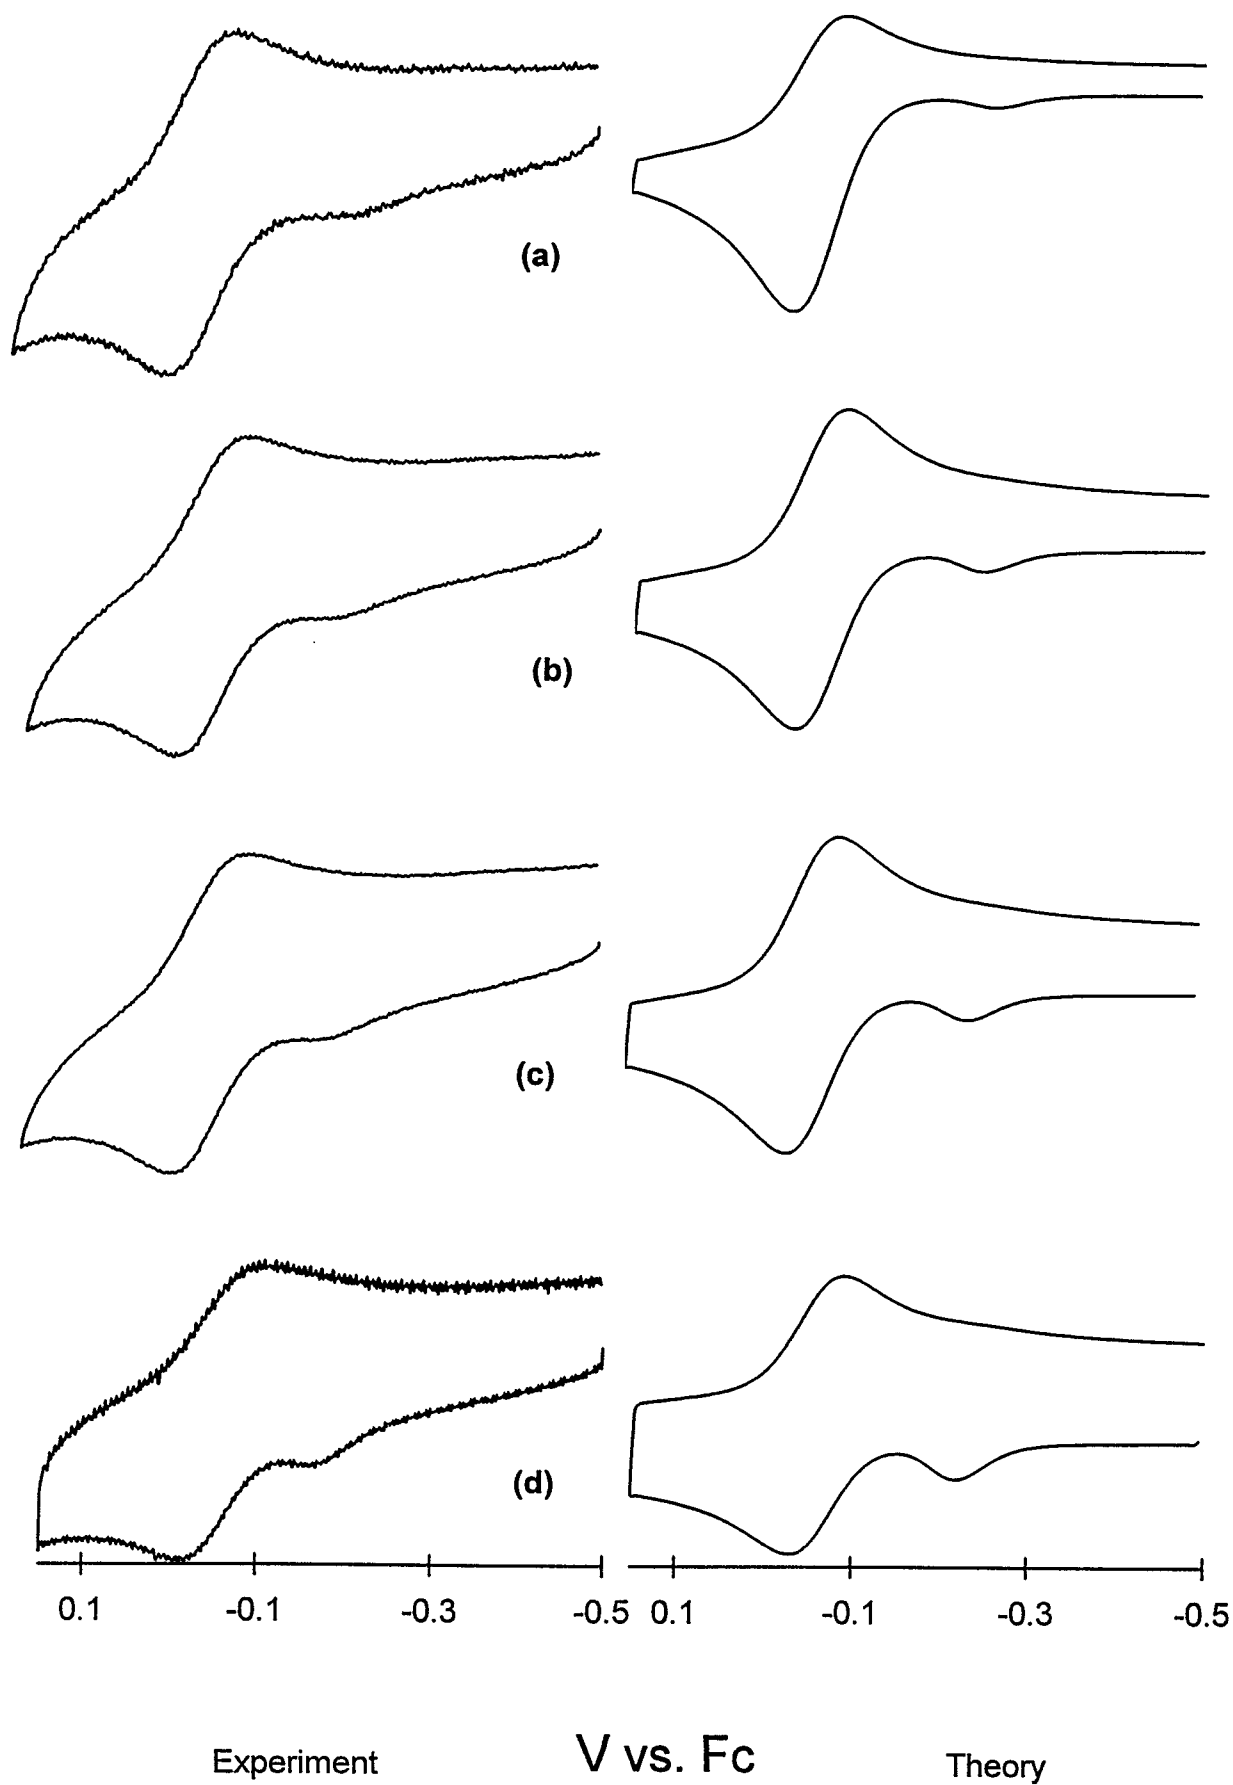

SM Fig 1

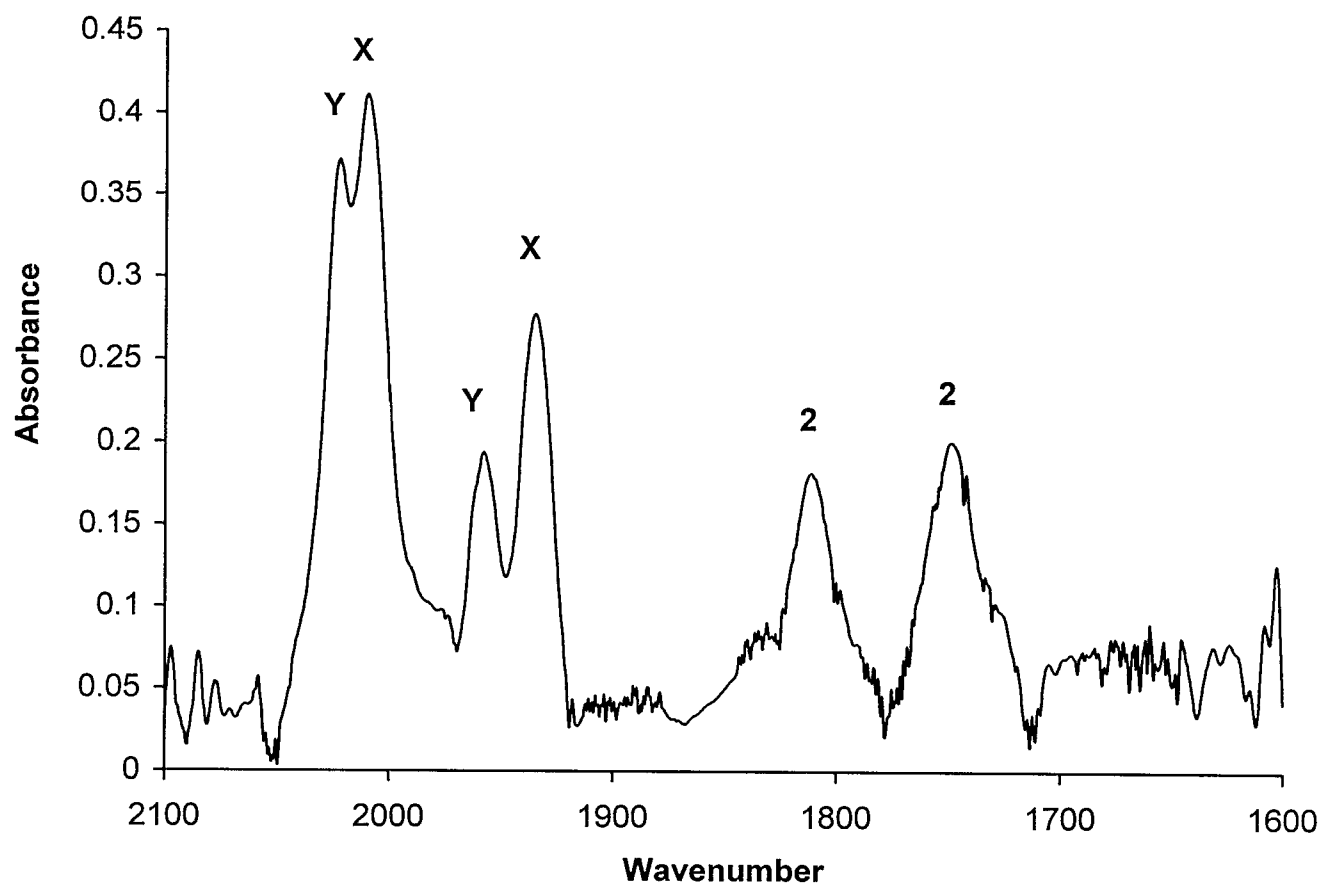

SM Fig 2

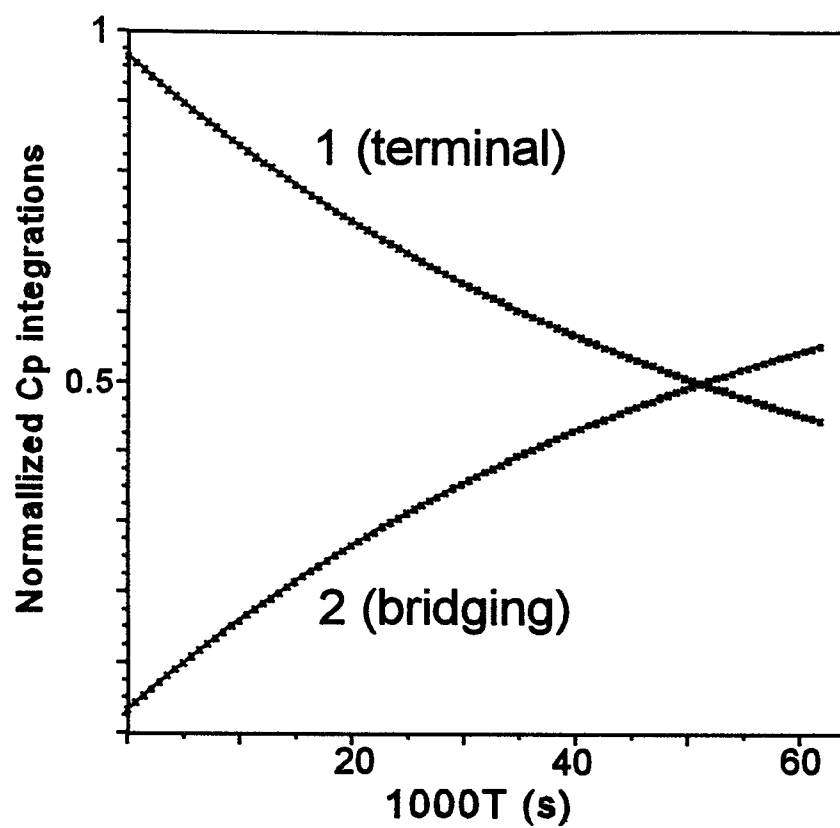

SM Fig 3

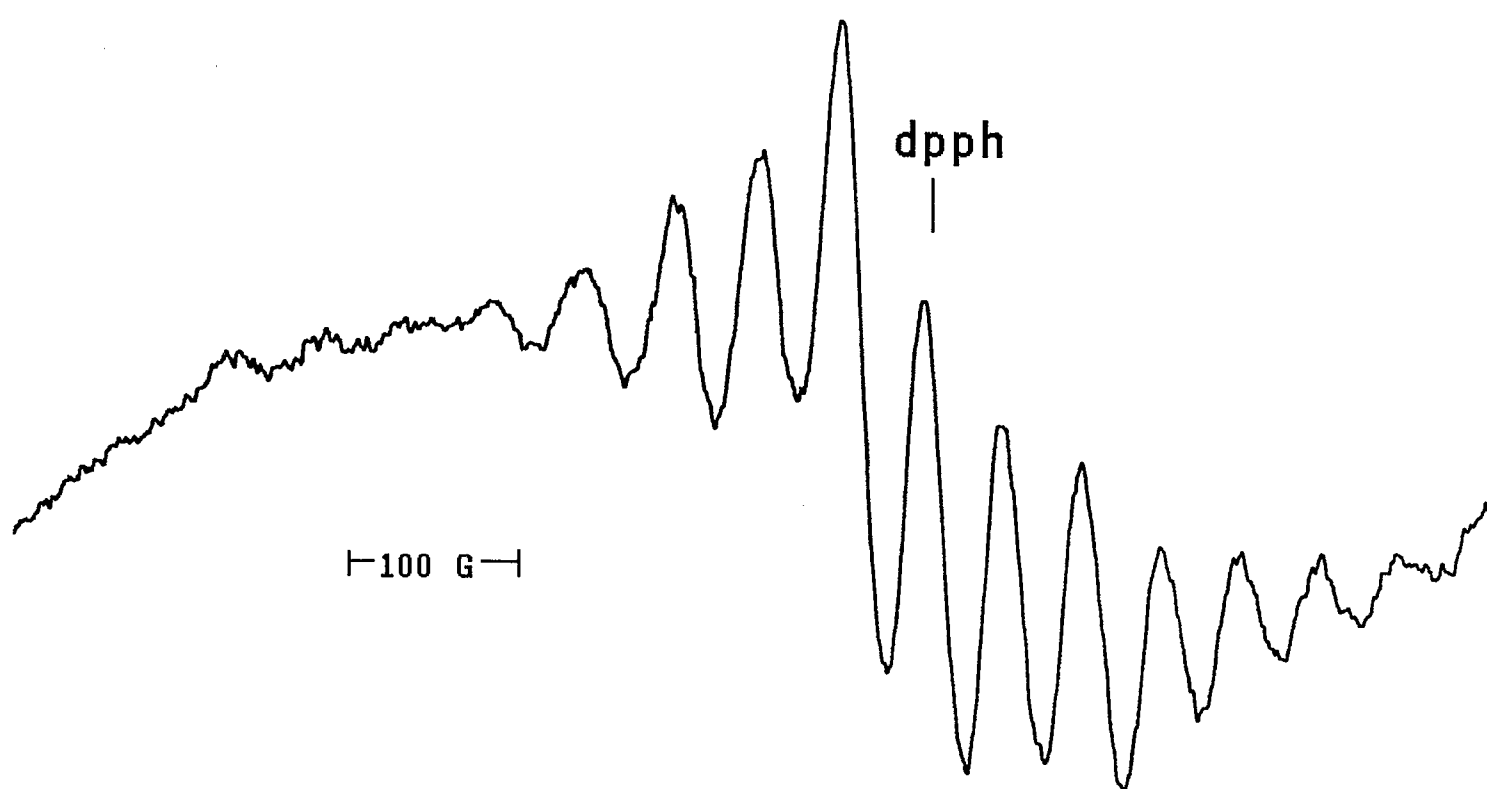

SM Fig 4
